# Supplementary material for: Case Report: Oceanic migratory behavior of chum salmon in the summer Bering Sea using a pop-up satellite archival tag
Source: Research Square preprint supplement (doi:10.21203/rs.3.rs-7337965/v1), 2025-08-19
Supplement: Supplementary file 1 [file 4d79988c2f476170dc3f444b.pdf]

## Supplemental materials

**Supplementary Table 1:** Model scores from WC-GPE3 geolocation estimates using different maximum migration speeds.

**Supplementary Table 2:** Akaike information criterion (AIC) and Bayesian information criterion (BIC) values for generalized linear models (GLMs) evaluating the relationships among activity time series ( $A$ ), diel period ( $f_{\text{Period}}$ ), and diving behavior ( $f_{\text{Dive}}$ ).

**Supplementary Table 3:** AIC and BIC values for generalized additive models (GAMs) evaluating the relationships among activity time series ( $A$ ), solar altitude ( $h$ ), and diving behavior ( $f_{\text{Dive}}$ ).

**Supplementary Figure 1:** Daily sea surface temperature (SST) recorded by pop-up satellite archival tags (PSATs).

**Supplementary Figure 2:** Partial effects of all terms of the final generalized additive model.

## Supplemental Tables

Supplementary Table 1: Model scores from WC-GPE3 geolocation estimates using different maximum migration speeds. The model with the highest score is shown in bold.

| Maximum swim speed ( $\text{m}\cdot\text{s}^{-1}$ ) | Model score  |
|-----------------------------------------------------|--------------|
| 0.3                                                 | 66.54        |
| 0.4                                                 | 69.72        |
| 0.5                                                 | 72.44        |
| 0.6                                                 | 74.06        |
| 0.7                                                 | 75.02        |
| 0.8                                                 | 75.42        |
| 0.9                                                 | 75.70        |
| 1.0                                                 | 75.92        |
| 1.1                                                 | 76.10        |
| <b>1.2</b>                                          | <b>76.20</b> |

Supplementary Table 2: AIC and BIC values for GLMs evaluating the relationships among activity time series ( $A$ ), diel periods ( $f_{\text{Period}}$ : daytime, nighttime, and twilight), and diving behavior ( $f_{\text{Dive}}$ : diving and surfacing). The best-fitting model (i.e., those with the lowest AIC and BIC) is shown in bold.

| Model                    | Formula                                      | df | AIC            | BIC            |
|--------------------------|----------------------------------------------|----|----------------|----------------|
| GLM-Full                 | $A \sim f_{\text{Period}} * f_{\text{Dive}}$ | 7  | <b>32472.3</b> | <b>32516.0</b> |
| GLM- $f_{\text{Period}}$ | $A \sim f_{\text{Period}}$                   | 4  | 32825.2        | 32850.2        |
| GLM- $f_{\text{Dive}}$   | $A \sim f_{\text{Dive}}$                     | 3  | 32904.6        | 32923.3        |
| GLM-Null                 | $A \sim I$                                   | 2  | 33214.5        | 33227.0        |

Supplementary Table 3: AIC and BIC values for GAMs evaluating the relationships among activity time series ( $A$ ), solar altitude ( $h$ ), and diving behavior ( $f_{\text{Dive}}$ ). The best-fitting model is shown in bold.

| Model                                                      | Model formula                                                       | df           | AIC            | BIC            |
|------------------------------------------------------------|---------------------------------------------------------------------|--------------|----------------|----------------|
| <b>GAM-<math>hf_{\text{Dive}}-h-f_{\text{Dive}}</math></b> | $A \sim s(h, \text{by} = f_{\text{Dive}}) + s(h) + f_{\text{Dive}}$ | <b>12.68</b> | <b>32360.0</b> | <b>32439.3</b> |
| GAM- $h-f_{\text{Dive}}$                                   | $A \sim s(h) + f_{\text{Dive}}$                                     | 11.70        | 32419.2        | 32492.3        |
| GAM- $hf_{\text{Dive}}-f_{\text{Dive}}$                    | $A \sim s(h, \text{by} = f_{\text{Dive}}) + f_{\text{Dive}}$        | 11.62        | 32672.3        | 32744.98       |
| GAM- $h$                                                   | $A \sim s(h)$                                                       | 10.59        | 32758.8        | 32825.08       |
| GAM- $f_{\text{Dive}}$                                     | $A \sim f_{\text{Dive}}$                                            | 3.0          | 32904.6        | 32923.32       |
| GAM-Null                                                   | $A \sim I$                                                          | 2.0          | 33214.5        | 33227.02       |

## Supplemental Figures

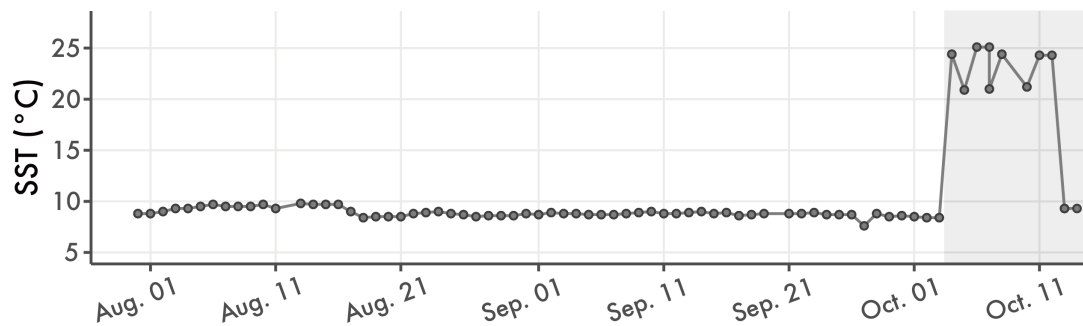

Supplementary Figure 1: Daily sea surface temperature (SST) recorded by pop-up satellite archival tags (PSATs). The shaded area represents the presumable predated periods.

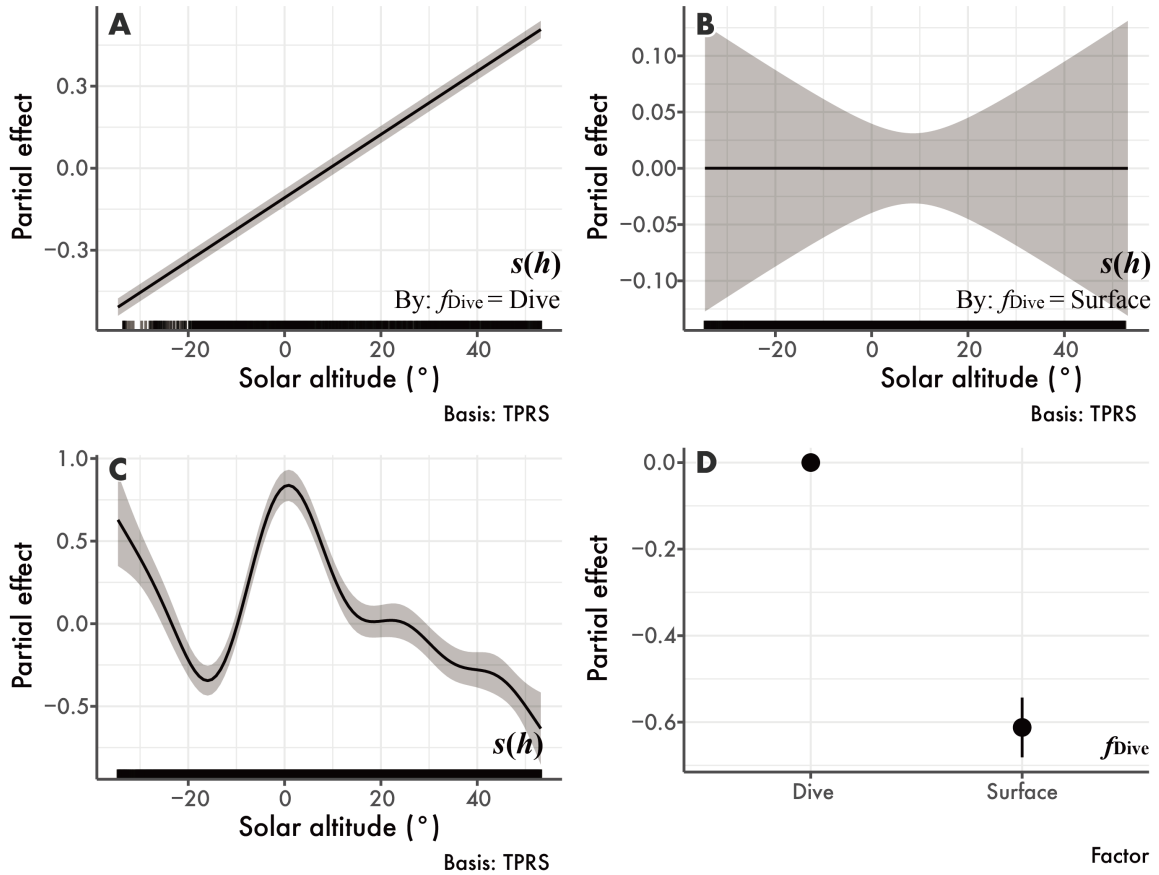

Supplementary Figure 2: Partial effects of all terms of the final generalized additive model (GAM- $hf_{Dive}-h-f_{Dive}$  in Supplementary Table 3). (A, B) Estimated smooth effect of solar altitude  $s(h)$  stratified diving behavior: diving (A) and surfacing (B), using thin-plate regression splines (TPRS). (C) Estimated smooth effect of solar altitude  $s(h)$ . (D) Estimated fixed effect of diving behavior. Shaded areas in (A)–(C) and error bars in (D) represent the 95% confidence intervals.
